# Supplementary material for: O-Dihaloarenes as aryne precursors for nickel-catalyzed [2 + 2 + 2] cycloaddition with alkynes and nitriles
Source: Royal Society of Chemistry journal article supplement (doi:10.1039/b801870g), 2008-01-01
Supplement: b801870g.pdf [file b801870g.pdf]

# ***o*-Dihaloarenes as Aryne Precursors for Nickel-Catalyzed Cycloaddition with Alkynes and Nitriles: a Novel Method to Polysubstituted Naphthalene, Phenanthridine and Triphenylene Derivatives**

**Jen-Chieh Hsieh and Chien-Hong Cheng\***

*Department of Chemistry, National Tsing Hua University, Hsinchu, 30013 Taiwan*

## **Supporting Information**

**General.** All reactions were conducted under nitrogen atmosphere on a dual-manifold Schlenk line unless otherwise mentioned and in oven-dried glass wares. All solvents were dried according to known methods and distilled prior to use. Substituted benzyne precursors were synthesized according to the literature procedures (see refs 1 and 2 in the main text). Other reagents were commercially available and used as purchased.

### **General procedure for the cyclotrimerization and reductive cyclization of diiodoarenes with acetylenes and nitrile:**

To a screw-capped sealed tube were added NiBr<sub>2</sub>(dppe) (31 mg, 0.050 mmol), dppe (20 mg, 0.050 mmol) and zinc powder (96 mg, 1.5 mmol). The tube was sealed with septum and flushed several times with nitrogen. *o*-Diiodoarene<sup>1,2</sup> (0.5 mmol), alkyne<sup>3</sup> (3.0 mmol) (or diyne (1.5 mmol)) and acetonitrile (1.0 mL) were injected into the reaction system via a syringe (Solid diiodoarene and alkyne could be added to the tube immediately after the addition of catalyst.). The septum was removed, and the tube was sealed with a screw cap quickly under nitrogen. The reaction mixture was stirred at 100 °C for 48 h. The crude reaction mixture was diluted with CH<sub>2</sub>Cl<sub>2</sub>, filtered through a thin Celite pad, and concentrated *in vacuo*. The residue was

chromatographed on a silica gel column using a mixture of hexane and EA as the eluent to give the desired pure product.

Products **3a-p**, and **5a-m**, were prepared according to this procedure.

For the synthesis of phenanthridines **6a-e**, the procedure is similar to that described above except that no extra dppe was used and the amount of solvent acetonitrile used was 2.5 ml.

The synthesis of triphenylene derivatives **7a-c** also followed a similar procedure using THF (2 ml) as the solvent and  $\text{NiBr}_2(\text{PPh}_3)_2$  as the catalyst. Spectral data for all of these compounds are listed below.

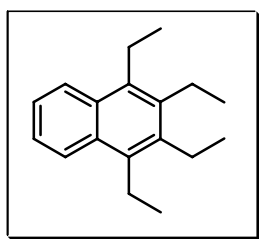

**1,2,3,4-Tetraethylnaphthalene (3a):**<sup>4</sup>

Colorless oil;  $^1\text{H}$  NMR (500 MHz,  $\text{CDCl}_3$ ):  $\delta$  1.24 (t,  $J = 6.5$  Hz, 6 H), 1.30 (t,  $J = 6.5$  Hz, 6 H), 2.84 (q,  $J = 6.5$  Hz, 4 H), 3.11 (q,  $J = 4.5$  Hz, 4 H), 7.41 (dd,  $J_1 = 8.0$  Hz,  $J_2 = 3.0$  Hz, 2 H), 8.03 (dd,  $J_1 = 8.0$  Hz,  $J_2 = 3.0$  Hz, 2 H);  $^{13}\text{C}$  NMR (125 MHz,  $\text{CDCl}_3$ ):  $\delta$  15.5, 15.8, 21.7, 22.8, 124.5, 124.5, 131.0, 135.4, 137.7; HRMS:  $\text{C}_{18}\text{H}_{24}$  calculated 240.1878, found 240.1882. Registry Number: [177327-40-1]

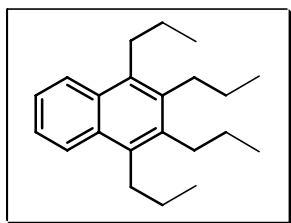

**1,2,3,4-Tetrapropylnaphthalene (3b):**<sup>5</sup>

Colorless oil;  $^1\text{H}$  NMR (500 MHz,  $\text{CDCl}_3$ ):  $\delta$  1.05 (t,  $J = 7.0$  Hz, 6 H), 1.10 (t,  $J =$

7.0 Hz, 6 H), 1.58 (s,  $J = 7.0$  Hz, 4 H), 1.67 (s,  $J = 7.0$  Hz, 2 H), 2.74 (t,  $J = 7.0$  Hz, 4 H), 3.01 (t,  $J = 7.0$  Hz, 4 H), 7.40 (dd,  $J_1 = 8.0$  Hz,  $J_2 = 3.0$  Hz, 2 H), 7.80 (dd,  $J_1 = 8.0$  Hz,  $J_2 = 3.0$  Hz, 2 H);  $^{13}\text{C}$  NMR (125 MHz,  $\text{CDCl}_3$ ):  $\delta$  14.9, 15.1, 24.5, 24.8, 31.3, 32.6, 124.4, 124.5, 131.1, 134.1, 136.7; HRMS:  $\text{C}_{22}\text{H}_{32}$  calculated 296.2504, found 296.2503. Registry Number: [42101-99-5]

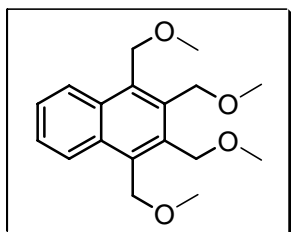

**1,2,3,4-Tetrakis(methoxymethyl)naphthalene (3c):**

Yellow oil;  $^1\text{H}$  NMR (500 MHz,  $\text{CDCl}_3$ ):  $\delta$  3.46 (s, 6 H), 3.47 (s, 6 H), 4.74 (s, 4 H), 4.97 (s, 4 H), 7.52 (dd,  $J_1 = 8.0$  Hz,  $J_2 = 3.0$  Hz, 2 H), 8.19 (dd,  $J_1 = 8.0$  Hz,  $J_2 = 3.0$  Hz, 2 H);  $^{13}\text{C}$  NMR (125 MHz,  $\text{CDCl}_3$ ):  $\delta$  58.3, 58.5, 67.7, 68.3, 125.1, 126.5, 132.9, 134.1, 134.4; HRMS:  $\text{C}_{18}\text{H}_{24}\text{O}_4$  calculated 304.1675, found 304.1678.

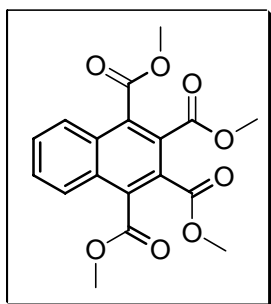

**Tetramethyl naphthalene-1,2,3,4-tetracarboxylate (3d):<sup>6</sup>**

Yellow solid, mp: 129-131 °C;  $^1\text{H}$  NMR (500 MHz,  $\text{CDCl}_3$ ):  $\delta$  3.90 (s, 6 H), 4.99 (s, 6 H), 7.69 (dd,  $J_1 = 8.0$  Hz,  $J_2 = 3.0$  Hz, 2 H), 8.06 (dd,  $J_1 = 8.0$  Hz,  $J_2 = 3.0$  Hz, 2 H);  $^{13}\text{C}$  NMR (125 MHz,  $\text{CDCl}_3$ ):  $\delta$  53.2, 53.2, 126.2, 128.2, 129.7, 130.0, 133.9, 166.7, 167.2; HRMS:  $\text{C}_{18}\text{H}_{16}\text{O}_8$  calculated 360.0845, found 360.0842. Registry Number: [36063-07-7]

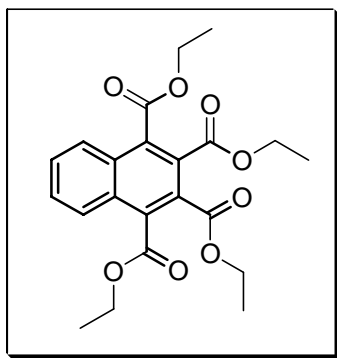

**Tetraethyl naphthalene-1,2,3,4-tetracarboxylate (3e):**<sup>7</sup>

Yellow oil; <sup>1</sup>H NMR (500 MHz, CDCl<sub>3</sub>): δ 1.34 (t, *J* = 7.0 Hz, 6 H), 1.40 (t, *J* = 7.0 Hz, 6 H), 4.34 (q, *J* = 7.0 Hz, 4 H), 4.48 (q, *J* = 7.0 Hz, 4 H), 7.68 (dd, *J*<sub>1</sub> = 8.0 Hz, *J*<sub>2</sub> = 3.0 Hz, 2 H), 8.06 (dd, *J*<sub>1</sub> = 8.0 Hz, *J*<sub>2</sub> = 3.0 Hz, 2 H); <sup>13</sup>C NMR (125 MHz, CDCl<sub>3</sub>): δ 13.9, 14.0, 62.3, 62.3, 126.1, 127.6, 129.5, 129.9, 133.9, 166.3, 166.8; HRMS: C<sub>22</sub>H<sub>24</sub>O<sub>8</sub> calculated 416.1471, found 416.1475. Registry Number: [107002-74-4]

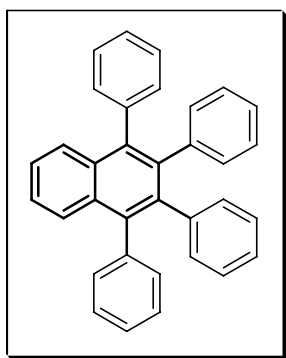

**1,2,3,4-Tetraphenylnaphthalene (3f):**<sup>6</sup>

White solid, mp: 157-159 °C; <sup>1</sup>H NMR (500 MHz, CDCl<sub>3</sub>): δ 6.83-6.87 (m, 10 H), 7.20-7.27 (m, 10 H), 7.40 (dd, *J*<sub>1</sub> = 8.0 Hz, *J*<sub>2</sub> = 3.0 Hz, 2 H), 7.66 (dd, *J*<sub>1</sub> = 8.0 Hz, *J*<sub>2</sub> = 3.0 Hz, 2 H); <sup>13</sup>C NMR (125 MHz, CDCl<sub>3</sub>): δ 125.3, 125.8, 126.4, 126.5, 126.9, 127.5, 131.3, 132.0, 138.4, 138.8, 139.5, 140.5; HRMS: C<sub>32</sub>H<sub>24</sub> calculated 432.1878, found 432.1881. Registry Number: [751-38-2]

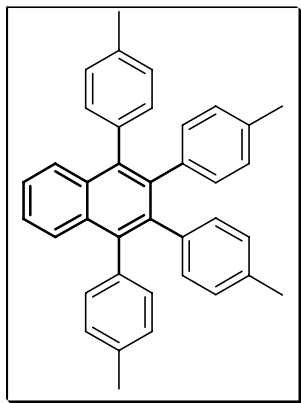

**1,2,3,4-Tetra-p-tolynaphthalene (3g):**<sup>8</sup>

Yellow solid, mp: 117-119 °C; <sup>1</sup>H NMR (500 MHz, CDCl<sub>3</sub>): δ 2.09 (s, 6 H), 2.31 (s, 6 H), 6.65 (d, *J* = 7.5 Hz, 4 H), 6.71 (d, *J* = 7.5 Hz, 4 H), 7.04 (d, *J* = 7.5 Hz, 4 H), 7.08 (d, *J* = 7.5 Hz, 4 H), 7.35 (dd, *J*<sub>1</sub> = 8.0 Hz, *J*<sub>2</sub> = 3.0 Hz, 2 H), 7.62 (dd, *J*<sub>1</sub> = 8.0 Hz, *J*<sub>2</sub> = 3.0 Hz, 2 H); <sup>13</sup>C NMR (125 MHz, CDCl<sub>3</sub>): δ 21.1, 21.2, 125.5, 126.9, 127.2, 128.2, 131.1, 132.2, 134.3, 135.6, 136.8, 137.8, 138.3, 139.1; HRMS: C<sub>38</sub>H<sub>32</sub> calculated 488.2504, found 488.2504. Registry Number: [1003853-52-8]

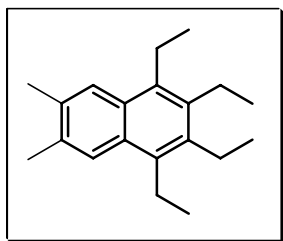

**1,2,3,4-Tetraethyl-6,7-dimethylnaphthalene (3h):**

Colorless oil; <sup>1</sup>H NMR (500 MHz, CDCl<sub>3</sub>): δ 1.19 (t, *J* = 6.5 Hz, 6 H), 1.28 (t, *J* = 6.5 Hz, 6 H), 2.42 (s, 6 H), 2.81 (q, *J* = 6.5 Hz, 4 H), 3.06 (q, *J* = 6.5 Hz, 4 H), 7.74 (s, 2 H); <sup>13</sup>C NMR (125 MHz, CDCl<sub>3</sub>): δ 15.6, 15.7, 21.6, 22.7, 23.5, 124.2, 127.3, 128.8, 131.2, 137.4; HRMS: C<sub>20</sub>H<sub>28</sub> calculated 268.2191, found 268.2192.

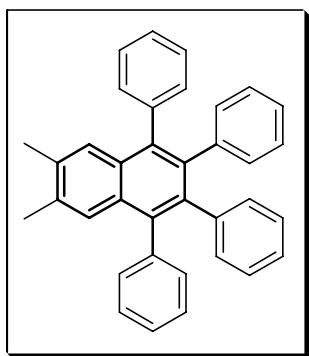

**6,7-Dimethyl-1,2,3,4-tetraphenylnaphthalene (3i):**<sup>9</sup>

Yellow solid, mp: 266-268 °C; <sup>1</sup>H NMR (500 MHz, CDCl<sub>3</sub>): δ 2.30 (s, 6 H), 6.81-6.84 (m, 10 H), 7.18-7.25 (m, 10 H), 7.38 (s, 2 H); <sup>13</sup>C NMR (125 MHz, CDCl<sub>3</sub>): δ 20.3, 125.1, 126.2, 126.4, 126.4, 127.4, 130.8, 131.3, 131.4, 135.6, 137.5, 138.0, 139.8, 140.8; HRMS: C<sub>36</sub>H<sub>28</sub> calculated 460.2191, found 460.2193. Registry Number: [76054-73-4]

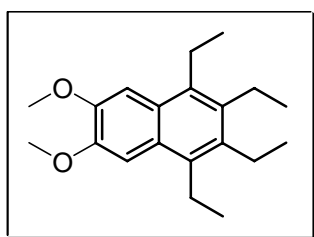

**1,2,3,4-Tetraethyl-6,7-dimethoxynaphthalene (3j):**

Colorless oil; <sup>1</sup>H NMR (500 MHz, CDCl<sub>3</sub>): δ 1.22 (t, *J* = 7.0 Hz, 6 H), 1.30 (t, *J* = 7.0 Hz, 6 H), 2.80 (q, *J* = 7.0 Hz, 4 H), 3.04 (q, *J* = 7.0 Hz, 4 H), 3.99 (s, 6 H), 7.28 (s, 2 H); <sup>13</sup>C NMR (125 MHz, CDCl<sub>3</sub>): δ 15.1, 16.0, 22.1, 22.7, 55.7, 103.8, 126.5, 134.0, 136.2, 148.3; HRMS: C<sub>20</sub>H<sub>28</sub>O<sub>2</sub> calculated 300.3089, found 300.2092.

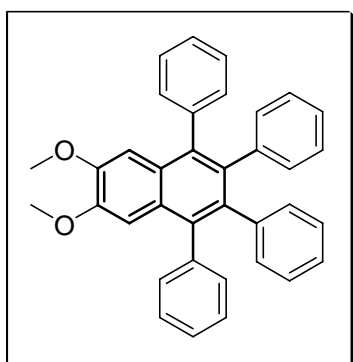

**6,7-Dimethoxy-1,2,3,4-tetraphenylnaphthalene (3k):**<sup>10</sup>

Yellow solid, mp: 305-307 °C; <sup>1</sup>H NMR (500 MHz, CDCl<sub>3</sub>): δ 3.73 (s, 6 H), 6.84 (m, 10 H), 6.94 (s, 2 H), 7.21-7.24 (m, 10 H); <sup>13</sup>C NMR (125 MHz, CDCl<sub>3</sub>): δ 55.6, 105.7, 125.1, 126.4, 127.6, 127.8, 131.1, 131.4, 137.0, 137.3, 139.9, 140.8, 149.2; HRMS: C<sub>36</sub>H<sub>28</sub>O<sub>2</sub> calculated 492.2089, found 492.2090. Registry Number: [26002-78-8]

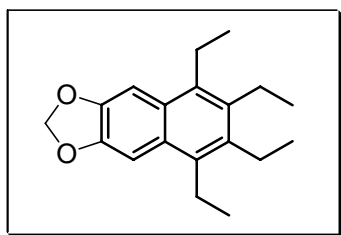

**5,6,7,8-Tetraethylnaphtho[2,3-*d*][1,3]dioxole (3l):**

Colorless oil; <sup>1</sup>H NMR (500 MHz, CDCl<sub>3</sub>): δ 1.20 (t, *J* = 7.0 Hz, 6 H), 1.26 (t, *J* = 7.0 Hz, 6 H), 2.78 (q, *J* = 7.0 Hz, 4 H), 2.98 (q, *J* = 7.0 Hz, 4 H), 5.99 (s, 2 H), 7.32 (s, 2 H); <sup>13</sup>C NMR (125 MHz, CDCl<sub>3</sub>): δ 15.2, 15.9, 22.2, 22.7, 100.7, 101.1, 127.8, 134.7, 136.4, 146.6; HRMS: C<sub>19</sub>H<sub>24</sub>O<sub>2</sub> calculated 284.1776, found 284.1779.

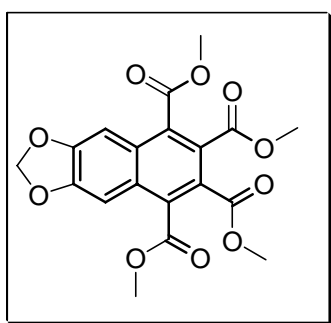

**Tetramethyl naphtho[2,3-*d*][1,3]dioxole-5,6,7,8-tetracarboxylate (3m):**

Yellow solid, mp: 120-122 °C; <sup>1</sup>H NMR (500 MHz, CDCl<sub>3</sub>): δ 3.87 (s, 6 H), 3.96 (s, 6 H), 6.12 (s, 2 H), 7.35 (s, 2 H); <sup>13</sup>C NMR (125 MHz, CDCl<sub>3</sub>): δ 53.0, 53.1, 102.4, 102.4, 126.4, 128.3, 134.2, 150.7, 166.9, 167.5; HRMS: C<sub>19</sub>H<sub>16</sub>O<sub>10</sub> calculated 404.0743, found 404.0745.

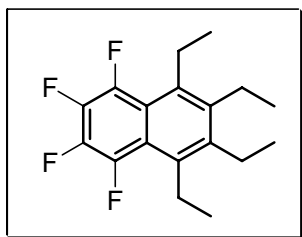

**1,2,3,4-Tetraethyl-5,6,7,8-tetrafluoronaphthalene (3n):**<sup>11</sup>

Colorless oil; <sup>1</sup>H NMR (500 MHz, CDCl<sub>3</sub>): δ 1.22 (t, *J* = 7.0 Hz, 6 H), 1.28 (t, *J* = 7.0 Hz, 6 H), 2.84 (q, *J* = 7.0 Hz, 4 H), 3.12 (broad, 4 H); <sup>13</sup>C NMR (125 MHz, CDCl<sub>3</sub>): δ 15.5, 15.7, 22.1, 22.3, 118.9, 133.9, 137.8, 140.7 (d, *J* = 240.0 Hz), 143.8 (d, *J* = 240.0 Hz); HRMS: C<sub>18</sub>H<sub>20</sub>F<sub>4</sub> calculated 312.1501, found 312.1502. Registry Number: [900167-12-6]

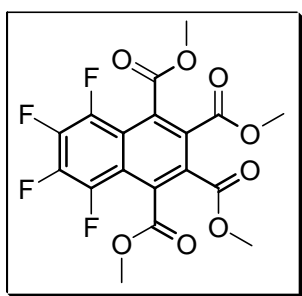

**Tetramethyl 5,6,7,8-tetrafluoronaphthalene-1,2,3,4-tetracarboxylate (3o):**

White solid, mp: 174-176 °C; <sup>1</sup>H NMR (500 MHz, CDCl<sub>3</sub>): δ 3.89 (s, 6 H), 3.99 (s, 6 H); <sup>13</sup>C NMR (125 MHz, CDCl<sub>3</sub>): δ 53.5, 54.3, 116.7, 129.1, 129.9, 138.4 (d, *J* = 245.0 Hz), 142.7 (d, *J* = 245.0 Hz), 165.2, 166.4, 143.8; HRMS: C<sub>18</sub>H<sub>12</sub>F<sub>4</sub>O<sub>8</sub> calculated 432.0468, found 432.0466.

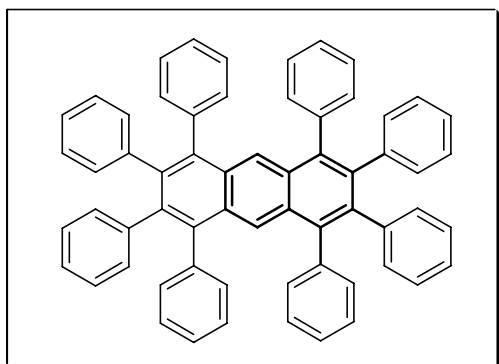

**1,2,3,4,5,6,7,8-Octaphenylanthracene (3p):**<sup>12</sup>



Yellow solid, mp: 766-768 °C;(very low solubility)  $^1\text{H}$  NMR (500 MHz,  $\text{CDCl}_3$ ):  $\delta$  6.79-6.83 (m, 20 H), 6.96-7.03 (m, 20 H), 7.89 (s, 2 H);  $^{13}\text{C}$  NMR (125 MHz,  $\text{CDCl}_3$ ):  $\delta$  125.3, 126.0, 126.5, 127.2, 130.8, 131.0, 131.1, 131.2, 131.3, 138.3, 139.2, 140.6; HRMS:  $\text{C}_{62}\text{H}_{42}$  calculated 786.3287, found 786.3283. Registry Number: [100367-30-4]

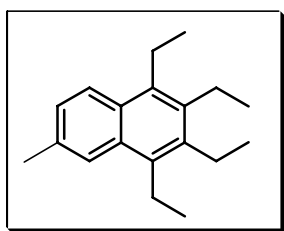

**1,2,3,4-Tetraethyl-6-methylnaphthalene (3q):**

Colorless oil;  $^1\text{H}$  NMR (500 MHz,  $\text{CDCl}_3$ ):  $\delta$  1.22 (t,  $J = 7.0$  Hz, 6 H), 1.30 (t,  $J = 7.0$  Hz, 6 H), 2.51 (s, 3 H), 2.83 (q,  $J = 7.0$  Hz, 4 H), 3.09 (q,  $J = 7.0$  Hz, 4 H), 7.25 (d,  $J = 9.0$  Hz, 1 H), 7.78 (s, 1 H), 7.92 (d,  $J = 9.0$  Hz, 1 H);  $^{13}\text{C}$  NMR (125 MHz,  $\text{CDCl}_3$ ):  $\delta$  15.5, 15.6, 15.8, 15.8, 21.6, 21.7, 22.1, 22.7, 22.8, 123.6, 124.4, 126.6, 129.1, 131.1, 133.8, 134.7, 135.2, 136.7, 137.8; HRMS:  $\text{C}_{19}\text{H}_{26}$  calculated 254.2035, found 254.2037.

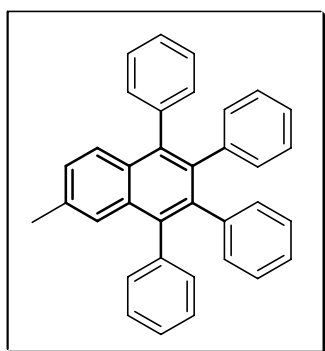

**6-Methyl-1,2,3,4-tetraphenylnaphthalene (3r):<sup>13</sup>**

White solid, mp: 195-197 °C;  $^1\text{H}$  NMR (500 MHz,  $\text{CDCl}_3$ ):  $\delta$  2.39 (s, 3 H), 6.81-6.87 (m, 10 H), 7.18-7.26 (m, 11 H), 7.41 (s, 1 H), 7.55 (d,  $J = 8.0$  Hz, 1 H);  $^{13}\text{C}$  NMR (125 MHz,  $\text{CDCl}_3$ ):  $\delta$  21.8, 125.2, 125.8, 126.3, 126.5, 126.9, 127.5, 128.1, 130.2, 131.2, 131.3, 131.3, 131.3, 132.1, 135.6, 137.7, 137.9, 138.2, 138.9, 139.7,

140.6, 140.7; HRMS: C<sub>35</sub>H<sub>26</sub> calculated 446.2034, found 446.2034. Registry Number:

[21991-42-4]

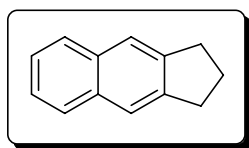

**2,3-Dihydro-1H-cyclopenta[b]naphthalene (5a):**<sup>14</sup>

White solid, mp: 84-86 °C; <sup>1</sup>H NMR (500 MHz, CDCl<sub>3</sub>): δ 2.13 (quintet, *J* = 10 Hz, 2 H), 3.05 (t, *J* = 7.5 Hz, 4 H), 7.37 (q, *J* = 6.5 Hz, 2 H), 7.65 (s, 2 H), 7.75 (q, *J* = 6.5 Hz, 2 H); <sup>13</sup>C NMR (125 MHz, CDCl<sub>3</sub>): δ 26.2, 32.6, 122.1, 124.8, 127.4, 132.6, 143.4; HRMS: C<sub>13</sub>H<sub>12</sub> calculated 168.0939, found 168.0937. Registry Number:

[1624-26-6]

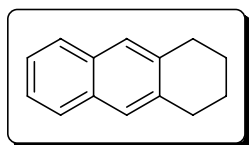

**1,2,3,4-Tetrahydroanthracene (5b):**<sup>14</sup>

White solid, mp: 92-94 °C; <sup>1</sup>H NMR (500 MHz, CDCl<sub>3</sub>): δ 1.85 (quintet, *J* = 10 Hz, 4 H), 2.96 (t, *J* = 7.5 Hz, 4 H), 7.34 (q, *J* = 6.5 Hz, 2 H), 7.52 (s, 2 H), 7.59 (q, *J* = 6.5 Hz, 2 H); <sup>13</sup>C NMR (125 MHz, CDCl<sub>3</sub>): δ 23.4, 29.8, 124.9, 126.6, 126.9, 132.1, 136.2; HRMS: C<sub>14</sub>H<sub>14</sub> calculated 182.1096, found 182.1095. Registry Number:

[2141-42-6]

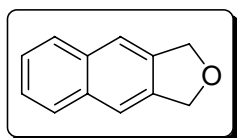

**1,3-Dihydro-2,3-c-furano[1,2,3-c]naphthalene (5c):**<sup>14</sup>

Yellow solid, mp: 153-155 °C; <sup>1</sup>H NMR (500 MHz, CDCl<sub>3</sub>): δ 5.12 (s, 4 H), 7.43 (q, *J* = 6.5 Hz, 2 H), 7.66 (s, 2 H), 7.80 (q, *J* = 6.5 Hz, 2 H); <sup>13</sup>C NMR (125 MHz, CDCl<sub>3</sub>): δ 72.8, 119.2, 125.7, 127.9, 133.1, 138.2; HRMS: C<sub>12</sub>H<sub>10</sub>O calculated 170.0732,

found 170.0730. Registry Number: [7193-16-0]

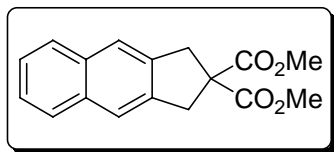

**1,3-Dihydrocyclopenta[*c*]naphthalene-2,2-dicarboxylic acid dimethyl ester (5d):**<sup>14</sup>

Yellow solid, mp: 120-122 °C; <sup>1</sup>H NMR (500 MHz, CDCl<sub>3</sub>): δ 3.71 (s, 4 H), 3.74 (s, 6 H), 7.38 (q, *J* = 6.5 Hz, 2 H), 7.63 (s, 2 H), 7.74 (q, *J* = 6.5 Hz, 2 H); <sup>13</sup>C NMR (125 MHz, CDCl<sub>3</sub>): δ 40.2, 53.0, 60.9, 122.5, 125.3, 127.6, 133.1, 138.8, 171.9; HRMS: C<sub>17</sub>H<sub>16</sub>O<sub>4</sub> calculated 284.1049, found 284.1050. Registry Number: [856897-90-0]

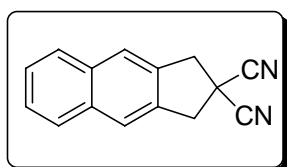

**1,3-Dihydrocyclopenta[*b*]naphthalene-2,2-dicarbonitrile (5e):**<sup>14</sup>

Yellow solid, mp: 161-163 °C; <sup>1</sup>H NMR (500 MHz, CDCl<sub>3</sub>): δ 3.84 (s, 4 H), 7.49 (q, *J* = 6 Hz, 2 H), 7.75 (s, 2 H), 7.80 (q, *J* = 6 Hz, 2 H); <sup>13</sup>C NMR (125 MHz, CDCl<sub>3</sub>): δ 34.3, 44.2, 116.1, 123.8, 126.6, 127.9, 133.4, 134.1; HRMS: C<sub>15</sub>H<sub>10</sub>N<sub>2</sub> calculated 218.0844, found 218.0842. Registry Number: [856897-91-1]

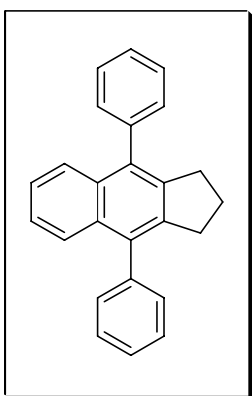

**2,3-Dihydro-4,9-diphenyl-1H-cyclopenta[*b*]naphthalene (5f):**<sup>15</sup>

White solid, mp: 169-171 °C; <sup>1</sup>H NMR (500 MHz, CDCl<sub>3</sub>): δ 2.00 (quintet, *J* = 8.0 Hz, 2 H), 2.88 (t, *J* = 8.0 Hz, 4 H), 7.28 (dd, *J*<sub>1</sub> = 8.0 Hz, *J*<sub>2</sub> = 3.0 Hz, 2 H), 7.40 (d, *J*

= 8.0 Hz, 4 H), 7.42 (t,  $J = 8.0$  Hz, 2 H), 7.50 (t,  $J = 8.0$  Hz, 4 H), 7.63 (dd,  $J_1 = 8.0$  Hz,  $J_2 = 3.0$  Hz, 2 H);  $^{13}\text{C}$  NMR (125 MHz,  $\text{CDCl}_3$ ):  $\delta$  25.7, 33.0, 124.7, 125.8, 127.0, 128.3, 130.1, 131.9, 134.1, 139.6, 141.1; HRMS:  $\text{C}_{25}\text{H}_{20}$  calculated 320.1565, found 320.1566. Registry Number: [1167-64-2]

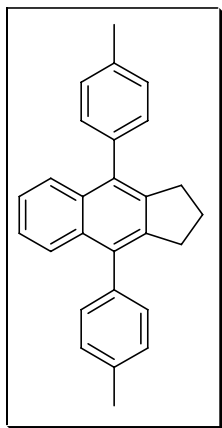

**2,3-Dihydro-4,9-bis(4-methylphenyl)-1H-cyclopenta[*b*]naphthalene (5g):**

White solid, mp: 169-171 °C;  $^1\text{H}$  NMR (500 MHz,  $\text{CDCl}_3$ ):  $\delta$  2.00 (quintet,  $J = 8.0$  Hz, 2 H), 2.88 (t,  $J = 8.0$  Hz, 4 H), 2.31 (s, 6 H), 7.05 (d,  $J = 8.0$  Hz, 4 H), 7.10 (d,  $J = 8.0$  Hz, 4 H), 7.27 (dd,  $J_1 = 8.0$  Hz,  $J_2 = 3.0$  Hz, 2 H), 7.64 (dd,  $J_1 = 8.0$  Hz,  $J_2 = 3.0$  Hz, 2 H);  $^{13}\text{C}$  NMR (125 MHz,  $\text{CDCl}_3$ ):  $\delta$  21.3, 25.7, 33.1, 55.3, 124.6, 125.9, 128.2, 131.1, 131.2, 132.1, 134.1, 139.6, 141.3; HRMS:  $\text{C}_{27}\text{H}_{24}$  calculated 348.1878, found 348.1881.

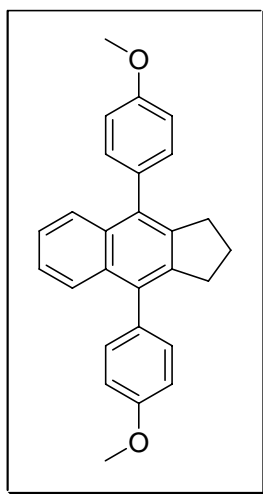

**2,3-Dihydro-4,9-bis(4-methoxyphenyl)-1H-cyclopenta[*b*]naphthalene (5h):**

White solid, mp: 204-206 °C;  $^1\text{H}$  NMR (500 MHz,  $\text{CDCl}_3$ ):  $\delta$  2.00 (quintet,  $J = 8.0$  Hz, 2 H), 2.87 (t,  $J = 8.0$  Hz, 4 H), 3.89 (s, 6 H), 7.03 (d,  $J = 8.0$  Hz, 4 H), 7.27 (dd,  $J_1 = 8.0$  Hz,  $J_2 = 3.0$  Hz, 2 H), 7.31 (d,  $J = 8.0$  Hz, 4 H), 7.65 (dd,  $J_1 = 8.0$  Hz,  $J_2 = 3.0$  Hz, 2 H);  $^{13}\text{C}$  NMR (125 MHz,  $\text{CDCl}_3$ ):  $\delta$  25.7, 33.1, 55.3, 113.7, 124.6, 125.9, 131.2, 131.9, 132.2, 133.6, 141.3, 158.6; HRMS:  $\text{C}_{27}\text{H}_{24}\text{O}_2$  calculated 380.1776, found 380.1778.

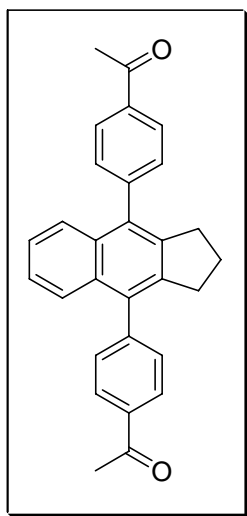

**2,3-Dihydro-4,9-bis(4-acetophenone)-1H-cyclopenta[b]naphthalene (5i):**

White solid, mp: 265-267 °C;  $^1\text{H}$  NMR (500 MHz,  $\text{CDCl}_3$ ):  $\delta$  2.02 (quintet,  $J = 8.0$  Hz, 2 H), 2.67 (s, 6 H), 2.85 (t,  $J = 8.0$  Hz, 4 H), 7.31 (dd,  $J_1 = 8.0$  Hz,  $J_2 = 3.0$  Hz, 2 H), 7.50 (d,  $J = 8.0$  Hz, 4 H), 7.55 (dd,  $J_1 = 8.0$  Hz,  $J_2 = 3.0$  Hz, 2 H), 8.10 (d,  $J = 8.0$  Hz, 4 H);  $^{13}\text{C}$  NMR (125 MHz,  $\text{CDCl}_3$ ):  $\delta$  25.7, 26.7, 32.8, 125.3, 125.6, 128.5, 130.4, 131.5, 132.0, 133.5, 141.1, 144.7, 197.9; HRMS:  $\text{C}_{29}\text{H}_{24}\text{O}_2$  calculated 404.1776, found 404.1778.

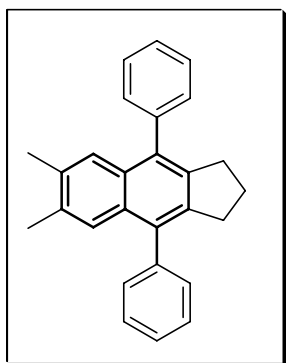

**2,3-Dihydro-6,7-dimethyl-4,9-diphenyl-1H-cyclopenta[*b*]naphthalene (5j):**

White solid, mp: 192-194 °C; <sup>1</sup>H NMR (500 MHz, CDCl<sub>3</sub>): δ 1.98 (quintet, *J* = 8.0 Hz, 2 H), 2.27 (s, 6 H), 2.84 (t, *J* = 8.0 Hz, 4 H), 7.37 (s, 2 H), 7.40 (d, *J* = 8.0 Hz, 4 H), 7.42 (t, *J* = 8.0 Hz, 2 H), 7.51 (t, *J* = 8.0 Hz, 4 H); <sup>13</sup>C NMR (125 MHz, CDCl<sub>3</sub>): δ 20.1, 25.7, 32.9, 125.4, 126.8, 128.2, 130.1, 130.7, 133.3, 134.2, 140.0, 140.1; HRMS: C<sub>27</sub>H<sub>24</sub> calculated 348.1878, found 348.1879.

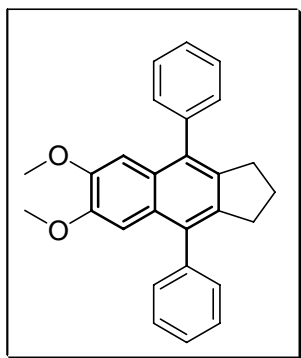

**2,3-Dihydro-6,7-dimethoxy-4,9-diphenyl-1H-cyclopenta[*b*]naphthalene (5k):**

White solid, mp: 150-152 °C; <sup>1</sup>H NMR (500 MHz, CDCl<sub>3</sub>): δ 1.98 (quintet, *J* = 8.0 Hz, 2 H), 2.84 (t, *J* = 8.0 Hz, 4 H), 3.73 (s, 6 H), 6.96 (s, 2 H), 7.40 (d, *J* = 8.0 Hz, 4 H), 7.42 (t, *J* = 8.0 Hz, 2 H), 7.52 (t, *J* = 8.0 Hz, 4 H); <sup>13</sup>C NMR (125 MHz, CDCl<sub>3</sub>): δ 25.7, 33.0, 55.5, 104.9, 127.0, 127.4, 128.4, 129.9, 133.0, 139.4, 139.9, 148.4; HRMS: C<sub>27</sub>H<sub>24</sub>O<sub>2</sub> calculated 380.1776, found 380.1778.

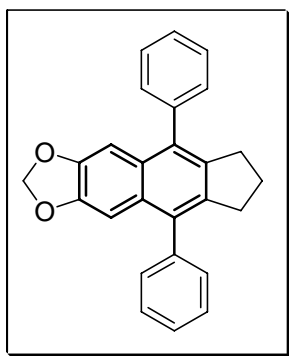

**2,3-Dihydro-4,9-diphenyl-1H-cyclopentanaphtho[2,3-*d*][1,3]dioxole (5l):**

White solid, mp: 141-143 °C; <sup>1</sup>H NMR (500 MHz, CDCl<sub>3</sub>): δ 1.98 (quintet, *J* = 8.0 Hz, 2 H), 2.84 (t, *J* = 8.0 Hz, 4 H), 5.76 (s, 6 H), 6.99 (s, 2 H), 7.40 (d, *J* = 8.0 Hz, 4

H), 7.42 (t,  $J = 8.0$  Hz, 2 H), 7.52 (t,  $J = 8.0$  Hz, 4 H);  $^{13}\text{C}$  NMR (125 MHz,  $\text{CDCl}_3$ ):  $\delta$  25.8, 33.5, 101.0, 102.2, 127.0, 127.8, 128.4, 130.0, 133.0, 140.1, 140.5, 146.7;  
HRMS:  $\text{C}_{26}\text{H}_{20}\text{O}_2$  calculated 364.1463, found 364.1462.

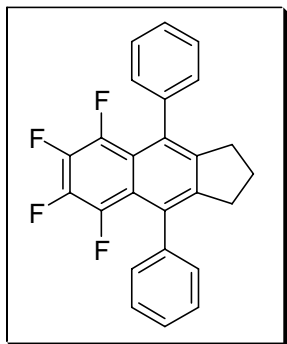

**2,3-Dihydro-5,6,7,8-tetrafluoro-4,9-diphenyl-1H-cyclopenta[*b*]naphthalene (5m):**

White solid, mp: 203-205 °C;  $^1\text{H}$  NMR (500 MHz,  $\text{CDCl}_3$ ):  $\delta$  2.00 (quintet,  $J = 8.0$  Hz, 2 H), 2.88 (t,  $J = 8.0$  Hz, 4 H);  $^{13}\text{C}$  NMR (125 MHz,  $\text{CDCl}_3$ ):  $\delta$  25.7, 33.0, 119.1, 125.8, 127.0, 128.3, 130.1, 137.9, 143.1(d,  $J = 240.0$  Hz), 145.2, 149.1(d,  $J = 240.0$  Hz); HRMS:  $\text{C}_{25}\text{H}_{16}\text{F}_4$  calculated 392.1188, found 392.1190.

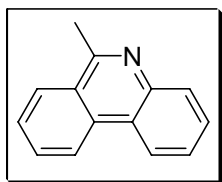

**6-Methylphenanthridine (6a):<sup>16</sup>**

Yellow solid, mp: 81-83 °C;  $^1\text{H}$  NMR (500 MHz,  $\text{CDCl}_3$ ):  $\delta$  3.03 (s, 3 H), 7.61 (t,  $J = 7.0$  Hz, 1 H), 7.67-7.71 (m, 2 H), 7.83 (t,  $J = 8.0$  Hz, 1 H), 8.08 (d,  $J = 8.0$  Hz, 1 H), 8.21 (d,  $J = 8.0$  Hz, 1 H), 8.52 (d,  $J = 8.0$  Hz, 1 H), 8.62 (d,  $J = 8.0$  Hz, 1 H);  $^{13}\text{C}$  NMR (125 MHz,  $\text{CDCl}_3$ ):  $\delta$  23.4, 121.9, 122.3, 123.8, 125.9, 126.3, 126.6, 127.3, 128.6, 129.3, 130.5, 132.6, 143.7, 158.9; HRMS:  $\text{C}_{14}\text{H}_{11}\text{N}$  calculated 193.0891, found 193.0890. Registry Number: [3955-65-5]

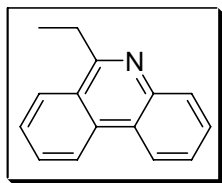

**6-Ethylphenanthridine (6b):**<sup>17</sup>

Yellow solid, mp: 55-57 °C; <sup>1</sup>H NMR (500 MHz, CDCl<sub>3</sub>): δ 1.50 (t, *J* = 7.5 Hz, 3 H), 3.40 (q, *J* = 7.5 Hz, 2 H), 7.61 (t, *J* = 7.0 Hz, 1 H), 7.67-7.71 (m, 2 H), 7.82 (t, *J* = 8.0 Hz, 1 H), 8.10 (d, *J* = 8.0 Hz, 1 H), 8.25 (d, *J* = 8.0 Hz, 1 H), 8.53 (d, *J* = 8.0 Hz, 1 H), 8.63 (d, *J* = 8.0 Hz, 1 H); <sup>13</sup>C NMR (125 MHz, CDCl<sub>3</sub>): δ 13.6, 29.4, 121.9, 122.5, 123.7, 125.0, 126.3, 126.3, 127.2, 128.6, 129.5, 130.3, 132.9, 143.7, 163.3; HRMS: C<sub>15</sub>H<sub>13</sub>N calculated 207.1048, found 207.1051. Registry Number: [13362-58-8]

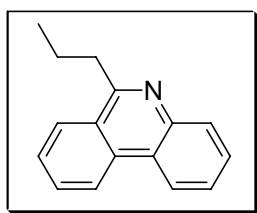

**6-Propylphenanthridine (6c):**<sup>17</sup>

Yellow oil, <sup>1</sup>H NMR (500 MHz, CDCl<sub>3</sub>): δ 1.08 (t, *J* = 7.5 Hz, 3 H), 1.96 (quintet, *J* = 7.5 Hz, 2 H), 3.34 (t, *J* = 7.5 Hz, 2 H), 7.61 (t, *J* = 8.0 Hz, 1 H), 7.66-7.71 (m, 2 H), 7.81 (t, *J* = 8.0 Hz, 1 H), 8.10 (d, *J* = 8.0 Hz, 1 H), 8.25 (d, *J* = 8.0 Hz, 1 H), 8.53 (d, *J* = 8.0 Hz, 1 H), 8.63 (d, *J* = 8.0 Hz, 1 H); <sup>13</sup>C NMR (125 MHz, CDCl<sub>3</sub>): δ 14.4, 23.0, 38.4, 121.9, 122.5, 123.7, 125.3, 126.3, 127.2, 128.6, 129.5, 130.3, 132.9, 143.7, 162.3; HRMS: C<sub>16</sub>H<sub>15</sub>N calculated 221.1204, found 221.1206. Registry Number: [31150-40-0]

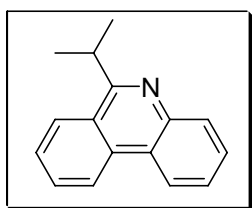

**6-Isopropylphenanthridine (6d):**<sup>16</sup>



Yellow oil,  $^1\text{H}$  NMR (500 MHz,  $\text{CDCl}_3$ ):  $\delta$  1.50 (s, s, 6 H), 3.99 (quintet,  $J = 6.5$  Hz, 1 H), 7.58 (t,  $J = 7.0$  Hz, 1 H), 7.67-7.70 (m, 2 H), 7.80 (t,  $J = 8.0$  Hz, 1 H), 8.13 (d,  $J = 8.0$  Hz, 1 H), 8.30 (d,  $J = 8.0$  Hz, 1 H), 8.53 (d,  $J = 8.0$  Hz, 1 H), 8.64 (d,  $J = 8.0$  Hz, 1 H);  $^{13}\text{C}$  NMR (125 MHz,  $\text{CDCl}_3$ ):  $\delta$  21.9, 31.5, 121.8, 122.6, 123.4, 124.7, 125.7, 126.2, 127.1, 128.4, 129.9, 129.9, 133.0, 143.8, 165.9; HRMS:  $\text{C}_{16}\text{H}_{15}\text{N}$  calculated 221.1204, found 221.1206. Registry Number: [16573-52-7]

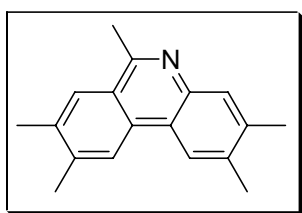

**2,3,6,8,9-pentamethylphenanthridine (6e):**

White solid, mp: 157-159  $^\circ\text{C}$ ;  $^1\text{H}$  NMR (500 MHz,  $\text{CDCl}_3$ ):  $\delta$  2.45 (s, 3 H), 2.48 (s, 6 H), 2.53 (s, 3 H), 2.96 (s, 3 H), 7.82 (s, 1 H), 7.90 (s, 1 H), 8.22 (s, 1 H), 8.31 (s, 1 H);  $^{13}\text{C}$  NMR (125 MHz,  $\text{CDCl}_3$ ):  $\delta$  20.1, 20.3 (2 C), 20.7, 23.1, 121.7, 121.9 (2 C), 122.3, 124.3, 124.7, 126.6, 127.8, 129.0, 130.8, 136.1, 137.6, 157.3; HRMS:  $\text{C}_{18}\text{H}_{19}\text{N}$  calculated 249.1517, found 249.1517.

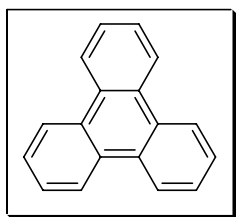

**Triphenylene (7a):**<sup>18</sup>

White solid, mp: 197-199  $^\circ\text{C}$ ;  $^1\text{H}$  NMR (500 MHz,  $\text{CDCl}_3$ ):  $\delta$  7.67 (dd,  $J_1 = 7.0$  Hz,  $J_2 = 3.0$  Hz, 6 H), 8.65 (dd,  $J_1 = 7.0$  Hz,  $J_2 = 3.0$  Hz, 6 H);  $^{13}\text{C}$  NMR (125 MHz,  $\text{CDCl}_3$ ):  $\delta$  123.2, 127.1, 129.7; HRMS:  $\text{C}_{18}\text{H}_{12}$  calculated 228.0939, found 228.0942.  
Registry Number: [217-59-4]

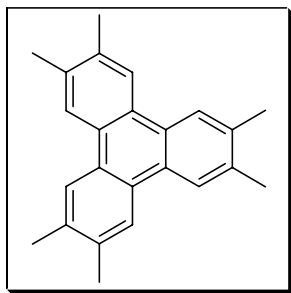

**2,3,6,7,10,11-Hexamethyltriphenylene (7b):**<sup>19</sup>

White solid, mp: 277-279 °C; <sup>1</sup>H NMR (500 MHz, CDCl<sub>3</sub>): δ 2.49 (s, 18 H), 8.32 (s, 6 H); <sup>13</sup>C NMR (125 MHz, CDCl<sub>3</sub>): δ 20.3, 123.6, 127.6, 135.3; HRMS: C<sub>24</sub>H<sub>24</sub> calculated 312.1878, found 312.1879. Registry Number: [26146-81-6]

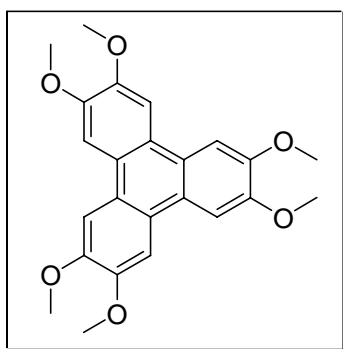

**2,3,6,7,10,11-Hexamethoxytriphenylene (7c):**<sup>20</sup>

White solid, mp: 330-332 °C; <sup>1</sup>H NMR (500 MHz, CDCl<sub>3</sub>): δ 4.11 (s, 18 H), 7.79 (s, 6 H); <sup>13</sup>C NMR (125 MHz, CDCl<sub>3</sub>): δ 56.1, 104.3, 123.2, 148.8; HRMS: C<sub>24</sub>H<sub>24</sub>O<sub>6</sub> calculated 408.1573, found 408.1571. Registry Number: [808-57-1]

## References

1. T. Muraki, H. Togo, M. Yokoyama, *Synlett*, **1998**, 286.
2. X. Zhou, Z. Li, H. Wang, M. Kitamura, K. -I. Kanno, K. Nakajima, T. Takahashi, *J. Org. Chem.*, **2004**, 69, 4559.
3. For diarylacetylenes: M. J. Mio, L. C. Kopel, J. B. Braun, T. L. Gadzikwa, K. L. Hull, R. G. Brisbois, C. J. Markworth, P. A. Grieco, *Org. Lett.*, **2002**, 4, 3199.
4. T. Takahashi, R. Hara, Y. Nishihara, M. Kotora, *J. Am. Chem. Soc.*, **1996**, 118,

5154.

5. D. M. Singleton, *Tetrahedron Letter*, **1973**, *15*, 1245.
6. D. Peña, D. Pérez, E. Guitian, L. Castedo, *J. Am. Chem. Soc.*, **1999**, *121*, 5827.
7. S. Kawasaki, T. Satoh, M. Miura, M. Nomura, *J. Org. Chem.*, **2003**, *68*, 6836.
8. T. Uto, M. Shimizu, K. Ueura, H. Tsurugi, T. Satoh, M. Miura, *J. Org. Chem.*, **2008**, *73*, 298.
9. B. Mayer, W. P. Neumann, *Tetrahedron Letter*, **1980**, *21*, 4887
10. C. W. Rees, D. E. West, *J. Chem. Soc. Section C Org.*, **1970**, *4*, 583.
11. Z. Wang, C. Wang, Z. Xi, *Tetrahedron Letter*, **2006**, *47*, 4157.
12. T. Takahashi, Y. Li, P. Stepnicka, M. Kitamura, Y. Liu, K. Nakajima, M. Kotora, *J. Am. Chem. Soc.*, **2002**, *124*, 576.
13. K. Ueura, T. Satoh, M. Miura, *J. Org. Chem.*, **2007**, *72*, 5362.
14. J.-C. Hsieh, D. K. Rayabarapu, C.-H. Cheng, *Chem. Commun.*, **2004**, 532.
15. G. Wittig, J. Weninlich, *Chem. Ber.*, **1965**, *98*, 471.
16. M. Lysén, J. L. Kristensen, P. Vedsø, M. Begtrup, *Org. Lett.* **2002**, *4*, 257.
17. R. C. Petterson, J. T. Bennett, D. C. Lankin, G. W. Lin, J. P. Mykytka, T. G. Troendle, *J. Org. Chem.*, **1974**, *39*, 1841.
18. D. Peña, S. Escudero, D. Pérez, E. Guitian, L. Castedo, *Angew. Chem., Int. Ed.*, **1998**, *37*, 2659.
19. Z. Liu, X. Zhang, R. Larock, *J. Am. Chem. Soc.*, **2005**, *127*, 15716.
20. G. Cooke, V. Sage, T. Richomme, *Syn. Comm.*, **1999**, *29*, 1767.
